# Supplementary material for: Outcomes of fertility treatment after radical trachelectomy for early stage cervical cancer
Source: Research Square preprint supplement (doi:10.21203/rs.3.rs-4573614/v1), 2024-07-13
Supplement: Supplementary file 1 [file 7dfc1fabf25c9f57df1693eb.xlsx]

## Sheet: Table 1
Table 1. Characteristics of patients in the study of fertility treatment after radical trachelectomy for early-stage cervical cancer
Number of patients		41
Female age at the radical trachelectomy (years)
Mean±SD		33.5 ± 4.3
Gravida, mean ± SD		0.3 ± 0.9
	0	33 (80.5%)
	1	6 (14.7%)
	2	1 (2.4%)
	5	1 (2.4%)
Para, mean ± SD		0.0 ± 0.2
	0	39 (95.1%)
	1	2 (4.9%)
BMI (kg/m2), mean ± SD		22.3 ± 4.1
AMH (ng/mL), median ± SD		3.1 ± 3.4
Stage (FIGO2008) (n,%)	IA1	3 (7.3)
	IA2	1 (2.4)
	IB1	37 (90.2)
Adjuvant chemotherapy (n,%)		5 (12.2)
Intraperitoneal infection after surgery (n,%)		10 (24.4)
Surgery to live birth (days)		1291 ± 1000
History of miscarriage (n)	0	39
	1	2
	<2	0
Indication for ART (n)	Tubal infertility	0
	Male infertility	0
	Unexplained	41
Number of in vitro fertilization treatment cycles before the initial visit	0	41
	<1	0
