# Supplementary material for: Outcomes of fertility treatment after radical trachelectomy for early stage cervical cancer
Source: Research Square preprint supplement (doi:10.21203/rs.3.rs-4573614/v1), 2024-07-13
Supplement: Supplementary file 2 [file 80d74b21a4e02acfd3957908.xlsx]

## Sheet: Table 3
Table 3. Comparison of embryological outcomes
	Clinical Pregnant (%)	Non-Clinical Pregnant (%)	p-value	Live Birth (%)	Non-Live Birth (%)	p-value
MII Oocyte Rate	96.7 ± 4.8	83.4 ± 35.7	0.173	97.0 ± 5.0	86.7 ± 30.9	0.108
<=35	96.9 ± 4.3	98.8 ± 2.1	0.163	97.1 ± 4.5	97.5 ± 3.5	0.25
>35	96.5 ± 5.6	79.2 ± 39.6	0.138	96.8 ± 5.8	80.4 ± 37.9	0.088
Fertilization Rate	71.2 ± 20.1	58.6 ± 28.0	0.025	70.4 ± 21.5	62.9 ± 25.7	0.077
<=35	74.3 ± 16.2	65.1 ± 13.3	0.06	73.6 ± 17.2	71.5 ± 14.3	0.191
>35	66.8 ± 24.9	56.8 ± 31.1	0.089	66.6 ± 26.2	57.8 ± 29.9	0.093
Blastocyst Formation Rate	55.4 ± 38.2	28.9 ± 39.0	0.009	54.9 ± 39.7	36.6 ± 39.2	0.026
<=35	56.3 ± 39.7	31.6 ± 54.7	0.078	56.5 ± 41.5	45.4 ± 44.0	0.099
>35	54.2 ± 37.9	28.2 ± 37.1	0.023	53.0 ± 39.7	31.4 ± 37.1	0.041
Good Quality Blastocyst Rate	37.1 ± 36.2	10.5 ± 26.7	0.004	38.5 ± 37.2	15.9 ± 29.4	0.01
<=35	44.4 ± 38.3	24.1 ± 41.7	0.092	50.5 ± 38.1	25.3 ± 35.9	0.037
>35	26.5 ± 31.5	6.8 ± 22.6	0.023	24.2 ± 32.2	10.4 ± 24.9	0.065
