# Supplementary material for: Outcomes of fertility treatment after radical trachelectomy for early stage cervical cancer
Source: Research Square preprint supplement (doi:10.21203/rs.3.rs-4573614/v1), 2024-07-13
Supplement: Supplementary file 3 [file b729e932513eb7ddcd8a1065.xlsx]

## Sheet: Table 2
Table 2. Comparison of patients who underwent controlled ovarian stimulation and embryo transfer
	Clinical pregnancy n=28	Non-clinical pregnancy n=13	P value	Live birth n=24	Non-live birth n=17	P value
Female age at the RT operation (years) , mean±SD	32.2 ± 4.2	36.2 ± 3.0	<0.001	32.3 ± 3.6	35.2 ± 4.6	0.003
Gravida, mean ± SD	0.4 ± 1.0	0.1 ± 0.4		0.5 ± 1.1	0.2 ± 0.4
Para, mean ± SD	0.1 ± 0.3	0.0 ± 0.0		0.1 ± 0.3	0.0 ± 0.0
Average age at first oocye retrieval (y)	34.9 ± 4.2	39.5 ± 3.3	<0.001	34.8 ± 4.1	38.6 ± 4.1	0.002
BMI (kg/m2), mean ± SD	22.5 ± 4.1	21.9 ± 4.0	0.107	22.1 ± 4.0	22.7 ± 4.3	0.231
AMH (ng/mL), median ± SD	2.38 ± 3.86	1.53 ± 1.23	0.349	2.43 ± 3.94	1.37 ± 1.14	0.181
Cervical stenosis per patient (%)	12 (42.8)	7 (53.8)	0.511	8 (33.3)	11 (64.7)	0.047
Cervical opening, n	8	4	0.885	5	7	0.158
Adjuvant chemotherapy, n (%)	3 (10.7)	2 (15.4)	1	2 (8.3)	3 (17.6)	0.633
Intraperitoneal infection after surgery, n (%)	6 (21.4)	4 (30.8)	0.698	5 (20.8)	5 (29.4)	0.714
TOWAKO, n	7	2	0.488	5	4	0.837
No. of oocytes retrieved per patient, mean ± SD	19.2 ± 18.8	10.4 ± 11.7	0.028	20.8 ± 20.5	10.9 ± 10.1	0.018
No. of embryo transfer (ET) per patient, median (range)	6 (1-13)	2 (0-8)	0.004	5 (1-13)	2 (0-10)	0.028
Endometrial thickness (mm), median ± SD	9.6 ± 2.9	9.0 ± 2.7	0.011	10.1 ± 2.1	8.9 ± 2.8	0.006
